# Supplementary material for: Evidence-Based Guideline on the Prevention and Management of Perioperative Pain for Breast Cancer Peoples in a Low-Resource Setting: A Systematic Review Article
Source: Anesthesiol Res Pract. 2023 Nov 3;2023:5668399. doi: 10.1155/2023/5668399 (PMC10637850; doi:10.1155/2023/5668399)
Supplement: Supplementary Materials — Supplementary Table 1a describes systematic data extraction by using PICO; and Supplementary Table 1b describes the studies included in the review for the guideline. [file 5668399.f1.zip]

Archive with 2 entries (2 files):
- Supplementary table - 1a (1).docx
- Supplementary table -1b.docx
